# Supplementary material for: “Three-in-one” nanocomposites as multifunctional nanozymes for ultrasensitive ratiometric fluorescence detection of alkaline phosphatase
Source: Royal Society of Chemistry journal article supplement (doi:10.1039/d2tb01365g), 2022-01-01
Supplement: d2tb01365g1.pdf [file d2tb01365g1.pdf]

## Supporting Information

# **“Three-in-One” Nanocomposite as Multifunctional Nanozyme for Ultrasensitive Ratiometric Fluorescence Detection of Alkaline Phosphatase**

Xuemei Li,<sup>a</sup> Mengchao Cai,<sup>a</sup> Zhiwei Shen,<sup>a</sup> Min Zhang,<sup>\*a</sup> Zisheng Tang,<sup>c,e,d,f,g</sup> Shi-Hua Luo,<sup>\*h</sup> and Na Lu<sup>\*a</sup>

<sup>a</sup> School of Materials Engineering, Shanghai University of Engineering Science, Shanghai 201620, China

<sup>b</sup> College of Chemistry and Chemical Engineering, Shanghai University of Engineering Science, Shanghai 201620, China

<sup>c</sup> Department of Endodontics, Shanghai Ninth People’s Hospital, Shanghai Jiao Tong University School of Medicine, Shanghai 200011, China

<sup>d</sup> College of Stomatology, Shanghai Jiao Tong University, Shanghai 200011, China

<sup>e</sup> National Center for Stomatology, Shanghai 200011, China

<sup>f</sup> National Clinical Research Center for Oral Diseases, Shanghai 200011, China

<sup>g</sup> Shanghai Key Laboratory of Stomatology, Shanghai 200011, China

<sup>h</sup> Department of Traumatology, Rui Jin Hospital, School of Medicine, Shanghai Jiao Tong University, Shanghai, 200025, China

E-mail addresses: zhangmin@sues.edu.cn (M. Zhang), jqab@163.com (S.-H. Luo),  
nlu2014@163.com (N. Lu).

## Table of Contents

|                                                                                                                                                               |     |
|---------------------------------------------------------------------------------------------------------------------------------------------------------------|-----|
| <b>Experimental Section</b> .....                                                                                                                             | S4  |
| <b>Table S1.</b> Comparison of kinetic parameters of different enzyme-like activities .....                                                                   | S5  |
| <b>Table S2.</b> Comparison of kinetic parameters of catechol oxidase-like activities .....                                                                   | S6  |
| <b>Table S3.</b> Comparison of different methods for ALP detection. ....                                                                                      | S7  |
| <b>Table S4.</b> Recovery Analysis of ALP in Human Serum Samples.....                                                                                         | S8  |
| <b>Figure S1.</b> TEM images of Fe <sub>3</sub> O <sub>4</sub> nanoparticles and Fe <sub>3</sub> O <sub>4</sub> @MnO <sub>2</sub> nanocomposites....<br>..... | S9  |
| <b>Figure S2.</b> XPS spectrum of Fef NCs. ....                                                                                                               | S10 |
| <b>Figure S3.</b> XPS spectra of Fe 2p for Fef NCs. ....                                                                                                      | S11 |
| <b>Figure S4.</b> Dependence of OXD-like activities on pH, temperature, and the<br>concentrations of Fef NCs.....                                             | S12 |
| <b>Figure S5.</b> Dependence of POD-like activities on pH, temperature, and the<br>concentrations of Fef NCs. ....                                            | S13 |
| <b>Figure S6.</b> H <sub>2</sub> O <sub>2</sub> detection based on POD-like activity of Fef NCs. ....                                                         | S14 |
| <b>Figure S7.</b> H <sub>2</sub> O <sub>2</sub> decomposition based on CAT-like activity of Fef NCs .....                                                     | S15 |
| <b>Figure S8.</b> Dependence of the CAT-like activity on the concentration of Fef NCs .....                                                                   | S16 |

|                                                                                                                                |     |
|--------------------------------------------------------------------------------------------------------------------------------|-----|
| <b>Figure S9.</b> SOD-like activity of Fef NCs .....                                                                           | S17 |
| <b>Figure S10.</b> Dependence of catechol oxidase-like activities of Fef NCs on pH and temperature .....                       | S18 |
| <b>Figure S11.</b> Time-dependent absorbance of aminochrome upon the addition of varying concentrations of Fef NCs .....       | S19 |
| <b>Figure S12.</b> Steady-state kinetic assays of catechol oxidase-like activities by varying concentrations of dopamine ..... | S20 |
| <b>Figure S13.</b> The OXD-like activity of Fef CNs was applied to different kinds of colorimetric substrates .....            | S21 |
| <b>Figure S14.</b> Three-dimensional fluorescence spectra of ARox and CUR.....                                                 | S22 |
| <b>Figure S15.</b> Ratiometric fluorescence detection of AA by using Fef NCs .....                                             | S23 |
| <b>Figure S16.</b> Ratiometric fluorescence detection of AA by using Fef NCs .....                                             | S24 |
| <b>Figure S17.</b> Photograph and SEM images of Fef NCs before and after the ratiometric fluorescence detection of ALP .....   | S25 |
| <b>REFERENCE</b> .....                                                                                                         | S26 |

## EXPERIMENTAL SECTION

**Materials and chemicals.** Alkaline phosphatase (ALP) was obtained from Sangon Biotech Co., Ltd. (Shanghai, China). Amplex Red (AR), curcumin (CUR), o-Phenylenediamine (OPD), L-Ascorbic acid 2-phosphate trisodium (AA2P), L-Ascorbic acid (AA), nitroblue tetrazolium (NBT), methionine, riboflavin, and 30% H<sub>2</sub>O<sub>2</sub> were purchased from Shanghai Titan Scientific Co., Ltd. (Shanghai, China). 2,2'-azino-bis(3-ethylbenzthiazoline)-6-sulfonic acid (ABTS), 3,3',5,5'-tetramethylbenzidine (TMB) was purchased from Sinopharm Chemical Reagent Co., Ltd. (Shanghai, China). Cerium (III) nitrate hexahydrate (Ce(NO<sub>3</sub>)<sub>3</sub>·6H<sub>2</sub>O), hexamethylenetetramine (HMT), Potassium permanganate (KMnO<sub>4</sub>), sodium acetate trihydrate (NaAc·3H<sub>2</sub>O), ferric chloride hexahydrate (FeCl<sub>3</sub>·6H<sub>2</sub>O), 3,5-Di-tert-butylcatechol (3,5-DTBC, 98%), and dopamine were purchased from Aladdin (Shanghai, China). All chemicals were used without further purification. Ultrapure water with a resistivity of 18 MΩ·cm<sup>-1</sup> was used in the assays.

**Table S1.** Comparison of kinetic parameters of different enzyme-like activities.

| Catalyst                                            | Enzyme-like Activity | Substrate                     | $K_m$ (mM) | $V_{max}$ ( $10^{-8}$ M s $^{-1}$ ) | Reference |
|-----------------------------------------------------|----------------------|-------------------------------|------------|-------------------------------------|-----------|
| Fef NCs                                             | OXD                  | TMB                           | 0.22       | 19.6                                | This work |
| <sup>a</sup> CeO <sub>2</sub> NPs                   | OXD                  | TMB                           | 1.50       | 6.9                                 | 1         |
| <sup>b</sup> MnO <sub>2</sub> NSs                   | OXD                  | TMB                           | 0.062      | 425                                 | 2         |
| Fef NCs                                             | POD                  | H <sub>2</sub> O <sub>2</sub> | 0.01       | 9.34                                | This work |
| Fe <sub>3</sub> O <sub>4</sub> NPs                  | POD                  | H <sub>2</sub> O <sub>2</sub> | 154        | 9.78                                | 3         |
| <sup>c</sup> Fe <sub>3</sub> O <sub>4</sub> @C YSNs | POD                  | H <sub>2</sub> O <sub>2</sub> | 0.27       | 12.0                                | 4         |
| Fef NCs                                             | CAT                  | H <sub>2</sub> O <sub>2</sub> | 0.72       | 210                                 | This work |
| <sup>d</sup> Mnf                                    | CAT                  | H <sub>2</sub> O <sub>2</sub> | 0.511      | 12000                               | 5         |
| Pd nanocubes                                        | CAT                  | H <sub>2</sub> O <sub>2</sub> | 102.4      | 220                                 | 6         |

<sup>a</sup> CeO<sub>2</sub> NPs: CeO<sub>2</sub> nanoparticles; <sup>b</sup> MnO<sub>2</sub> NSs: MnO<sub>2</sub> nanosheets; <sup>c</sup> Fe<sub>3</sub>O<sub>4</sub>@C YSNs: Fe<sub>3</sub>O<sub>4</sub>@C yolk-shell nanostructures; <sup>d</sup> Mnf: Mn<sub>3</sub>O<sub>4</sub> nanoparticles with flower-like morphology.

**Table S2.** Comparison of kinetic parameters of catechol oxidase-like activities.

| Catalyst         | Substrate | $K_m$ (mM) | $V_{max}$ ( $10^{-8}$ M s $^{-1}$ ) | Reference |
|------------------|-----------|------------|-------------------------------------|-----------|
| Fef NCs          | 3,5-DTBC  | 0.11       | 85                                  | This work |
|                  | Dopamine  | 0.61       | 86                                  | This work |
| MOF-818          | 3,5-DTBC  | 0.81       | 317                                 | 7         |
|                  | Dopamine  | 0.48       | 8                                   | 7         |
| CeO $_2$         | 3,5-DTBC  | 1.262      | 18.2                                | 7         |
| Pt NPs           | 3,5-DTBC  | 1.811      | 471                                 | 7         |
| Catechol oxidase | 3,5-DTBC  | 0.5        | -                                   | 8         |

**Table S3.** Comparison of different methods for ALP detection.

| Sensing system                                     | Method               | Linear range (mU/mL) | LOD (mU/mL) | Reference |
|----------------------------------------------------|----------------------|----------------------|-------------|-----------|
| PDA liposomes                                      | Colorimetry          | 10-200               | 2.8         | 9         |
| <sup>a</sup> N/S-CDs                               | Fluorescence         | 2.5-70               | 0.396       | 10        |
| <sup>b</sup> Au/LDO                                | Colorimetry          | 4-60                 | 1.35        | 11        |
| Nucleotide coordinated copper ion                  | Colorimetry          | 10-30                | 0.3         | 12        |
|                                                    | Fluorescence         | 1-30                 | 0.45        |           |
| <sup>c</sup> RhB@Alg/Fe <sup>3+</sup>              | Visual detection     | 1-400                | 0.37        | 13        |
| <sup>d</sup> AIEgen-peptide conjugate              | Fluorescence         | 1-1000               | 1.2         | 14        |
| <sup>e</sup> CDs /OPD                              | Fluorescence         | 5-350                | 3.6         | 15        |
| <sup>f</sup> AgNPrs-Cu <sup>2+</sup>               | Distance measurement | 5-50, 50-200         | 5           | 16        |
| MnO <sub>2</sub> nanosheets                        | Fluorescence         | 0.25-10              | 0.06        | 17        |
| dephosphorylation-initiated transcription reaction | Fluorescence         | 0.05-1               | 0.02        | 18        |
| Phenyl phosphate                                   | Electrochemistry     | 20-1500              | 3           | 19        |
| Aminoferrocene labeled ssDNA                       | Electrochemistry     | 20-100               | 1.48        | 20        |
| Fef NCs                                            | Fluorescence         | 0.2-0.1              | 0.19        | This work |

<sup>a</sup> N/S-CDs: sulfur co-doped carbon dots; <sup>b</sup> Au/LDO: Au-decorated CoAl-layered double oxide nanozymes; <sup>c</sup> RhB@Alg/Fe<sup>3+</sup>: alginate hydrogel crosslinked with Fe<sup>3+</sup> and rhodamine B (RhB); <sup>d</sup> AIEgens: aggregation-induced emission luminogens; <sup>e</sup> CDs /OPD: carbon dots o-phenylenedi-amine; <sup>f</sup> AgNPrs-Cu<sup>2+</sup>: silver hexagonal nanoprism-Cu<sup>2+</sup>.



**Table S4.** Recovery Analysis of ALP in Human Serum Samples.

| No.       | Added (mU/mL) | Total detected (mU/mL) | Recovery (%) | RSD (%) |
|-----------|---------------|------------------------|--------------|---------|
| Samples 1 | 0             | 0.11                   |              |         |
|           | 0.5           | 0.63                   | 102%         | 2.3%    |
|           | 1             | 1.10                   | 99%          | 0.4%    |
| Samples 2 | 0             | 0.30                   |              |         |
|           | 0.5           | 0.77                   | 94.6%        | 3.3%    |
|           | 1             | 1.31                   | 101%         | 0.7     |

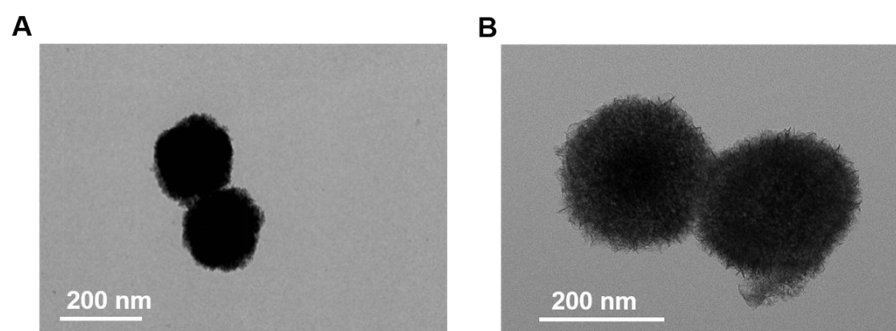

**Figure S1.** TEM images of (A)  $\text{Fe}_3\text{O}_4$  nanoparticles (NPs) and (B)  $\text{Fe}_3\text{O}_4@MnO_2$  nanocomposites (NCs).

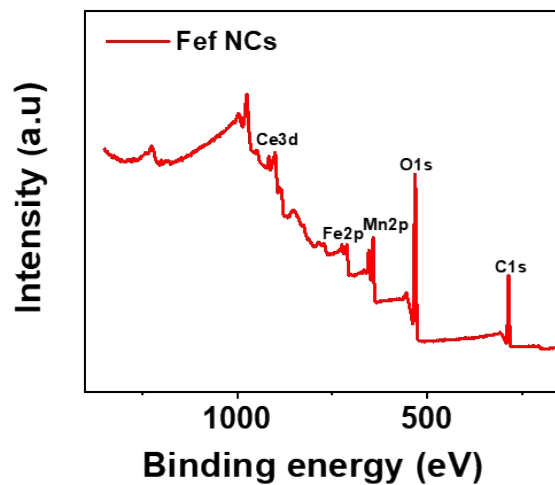

**Figure S2.** XPS spectrum of Fef NCs.

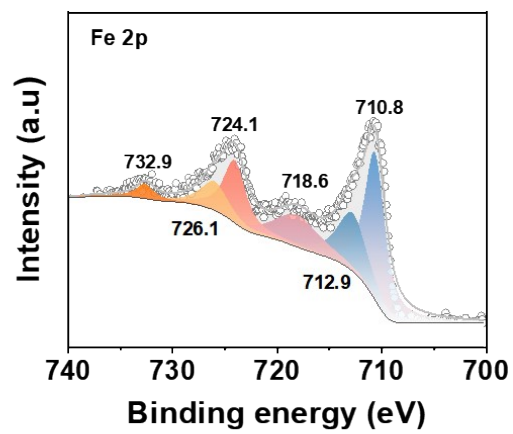

**Figure S3.** XPS spectra of Fe 2p for Fe NCs.

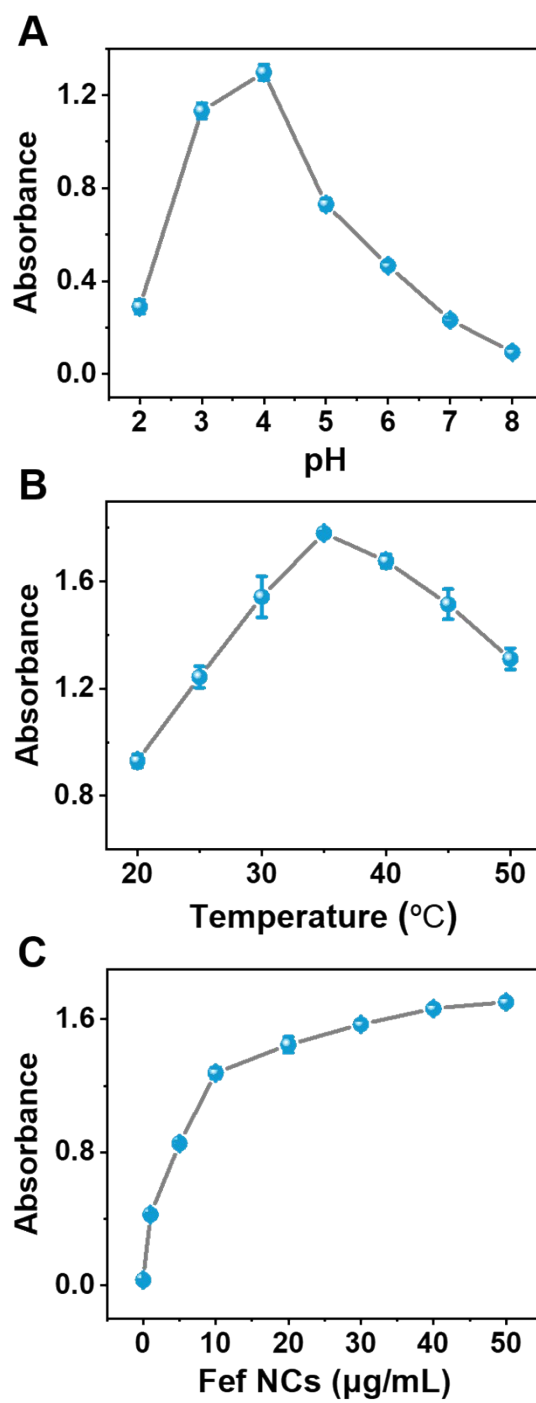

**Figure S4.** Dependence of OXD-like activities on (A) pH, (B) temperature, and (C) the concentrations of Fef NCs.

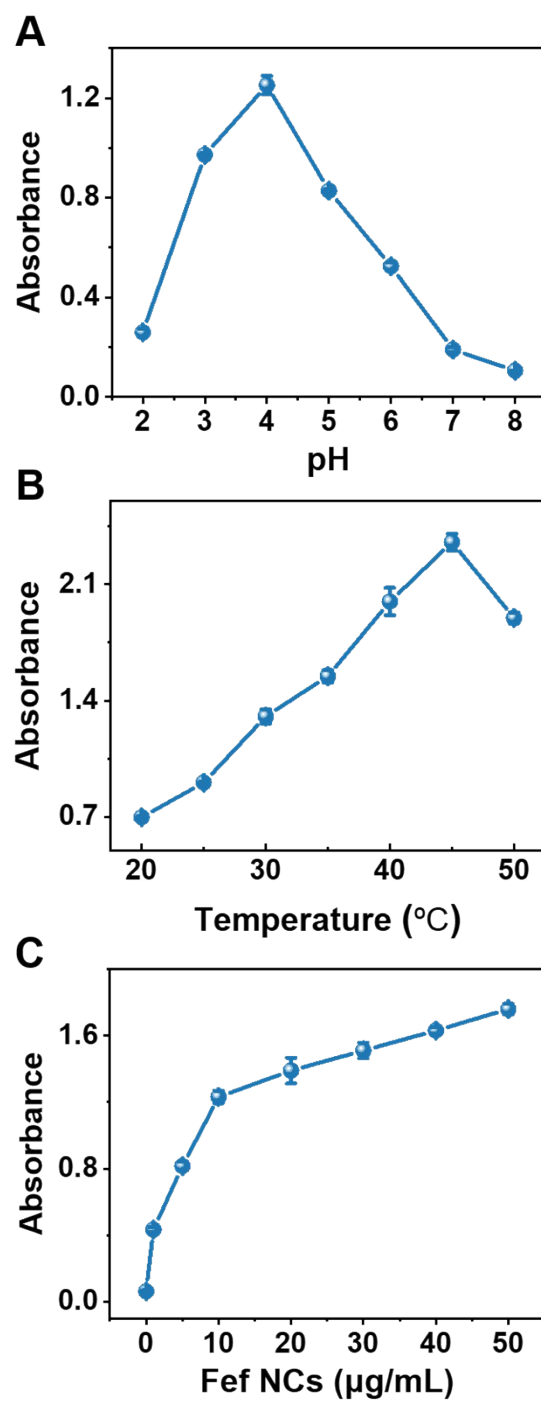

**Figure S5.** Dependence of POD-like activities on (A) pH, (B) temperature, and (C) the concentrations of Fef NCs.

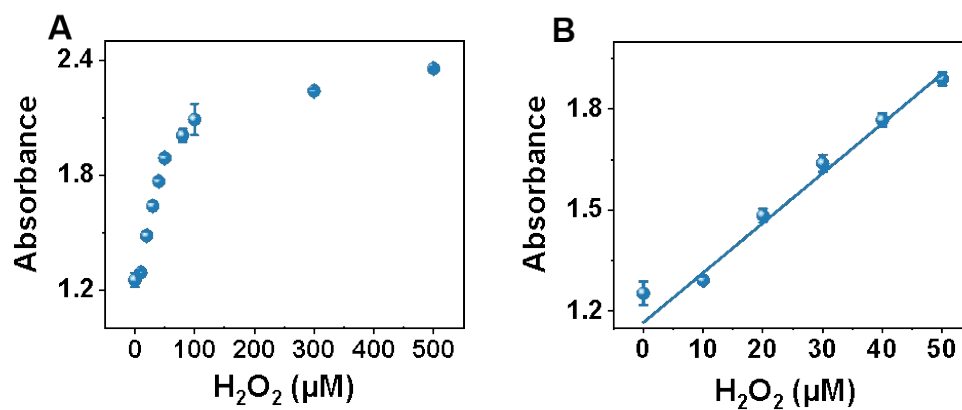

**Figure S6.** H<sub>2</sub>O<sub>2</sub> detection based on POD-like activity of Fef NCs. (A) Relationship between the absorbance and the concentrations of H<sub>2</sub>O<sub>2</sub>. (B) Linear calibration curve for H<sub>2</sub>O<sub>2</sub> detection.

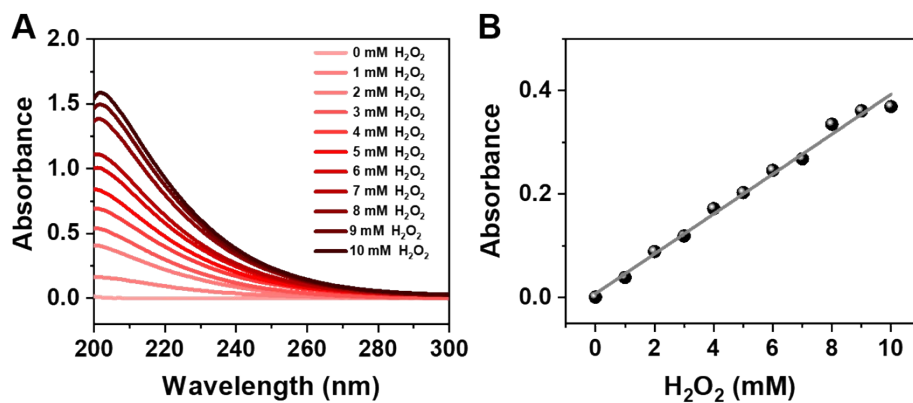

**Figure S7.** H<sub>2</sub>O<sub>2</sub> decomposition based on CAT-like activity of Fef NCs. (A) UV-Vis absorption spectra with increasing H<sub>2</sub>O<sub>2</sub> concentrations. (B) Linear relationship between the absorbance at 240 nm and the concentration of H<sub>2</sub>O<sub>2</sub>.



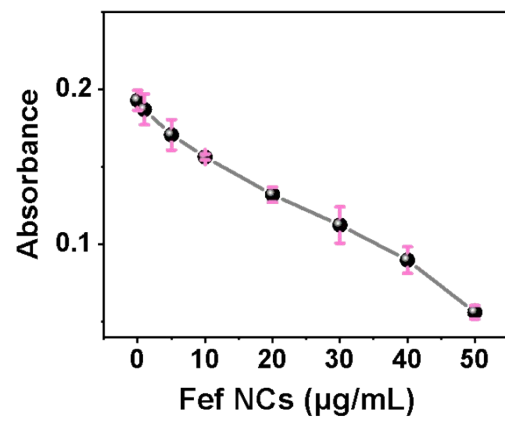

**Figure S8.** Dependence of the CAT-like activity on the concentration of Fef NCs



|                   | <b>a</b> | <b>b</b> | <b>c</b> | <b>d</b> | <b>e</b> | <b>f</b> | <b>g</b> | <b>h</b> | <b>i</b> |
|-------------------|----------|----------|----------|----------|----------|----------|----------|----------|----------|
| <b>Riboflavin</b> | -        | -        | -        | -        | +        | +        | +        | +        | +        |
| <b>Methionine</b> | -        | +        | -        | -        | -        | +        | +        | +        | +        |
| <b>NBT</b>        | -        | -        | +        | -        | -        | +        | +        | +        | +        |
| <b>Fef NCs</b>    | -        | -        | -        | +        | -        | +        | +        | -        | -        |
| <b>PB</b>         | +        | +        | +        | +        | +        | +        | +        | +        | +        |
| <b>Light</b>      | +        | +        | +        | +        | +        | -        | +        | -        | +        |

**Figure S9.** SOD-like activity of Fef NCs. Photograph of different reaction systems.

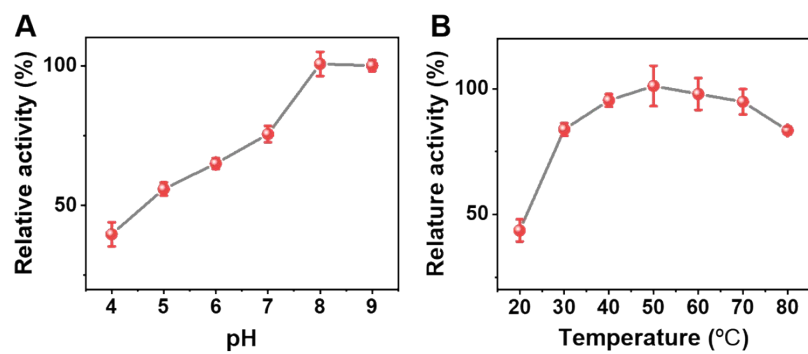

**Figure S10.** Dependence of catechol oxidase-like activities of Fef NCs on (A) pH and (B) temperature.

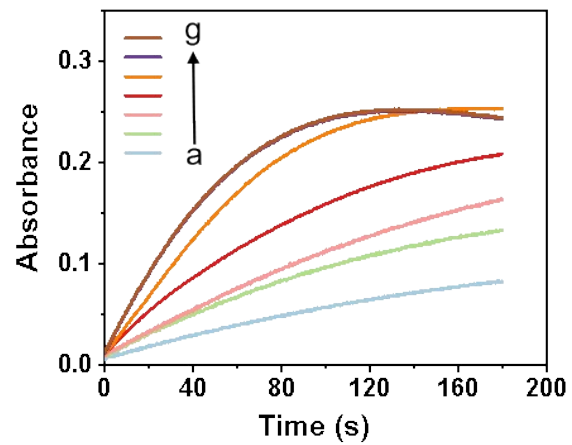

**Figure S11.** Time-dependent absorbance of aminochrome upon the addition of varying concentrations of Fef NCs (From a to g: 1, 5, 10, 20, 30, 40, and 50  $\mu\text{g}/\text{mL}$  ).

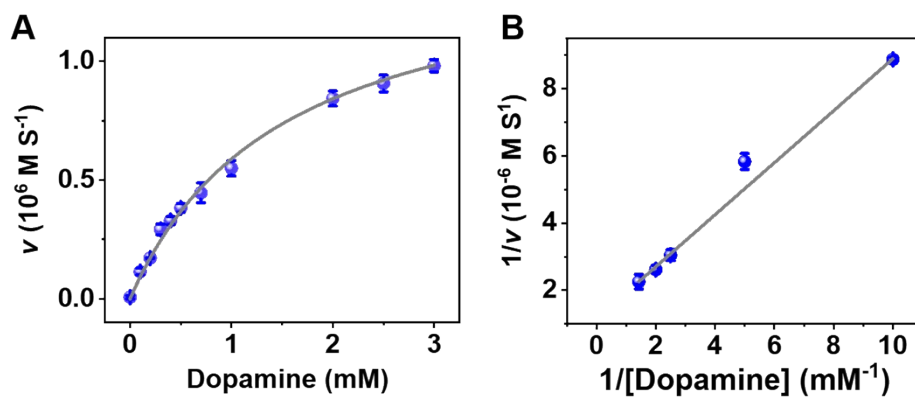

**Figure S12.** Steady-state kinetic assays of catechol oxidase-like activities by varying concentrations of dopamine. (A) Michaelis-Menten curve of Fef NCs for Dopamine. (B) The Lineweaver-Burk plot of the double reciprocal of the Michaelis-Menten equation.

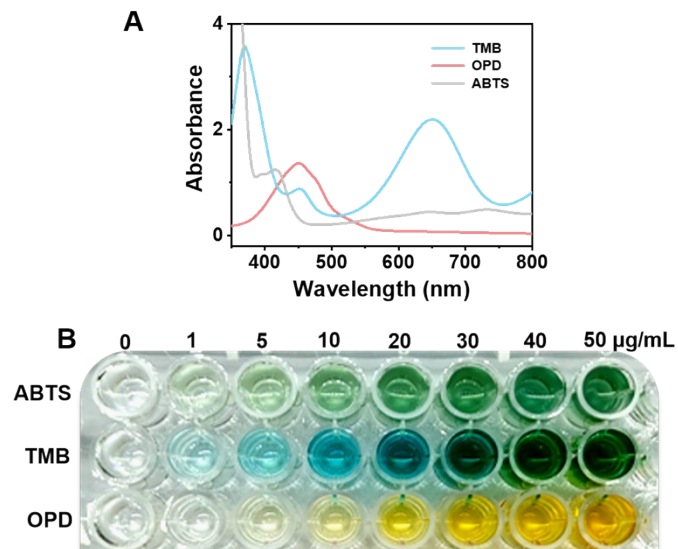

**Figure S13.** The OXD-like activity of Fef CNs was applied to different kinds of colorimetric substrates, including TMB, ABTS, and OPD. (A) UV-Vis absorption spectra of different oxidized substrates in dissolved oxygen in the presence of Fef CNs at room temperature. (B) Photograph of different substrate reaction solutions with varying concentrations of Fef NCs.

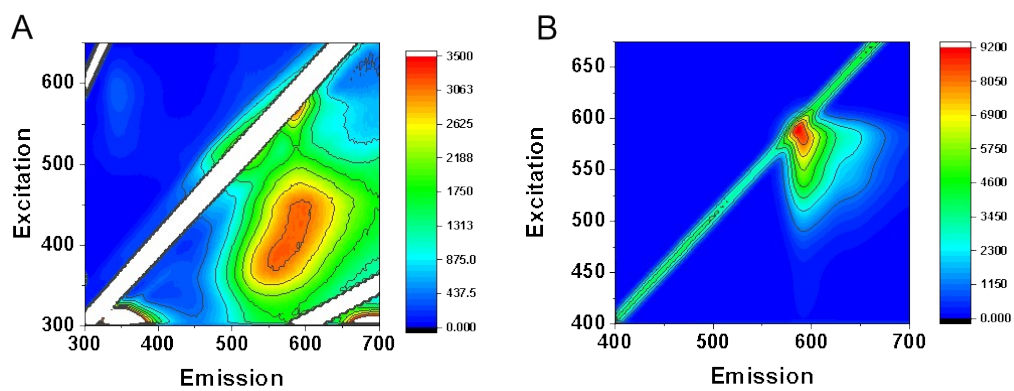

**Figure S14.** Three-dimensional fluorescence spectra of (A) ARox and (B) CUR.

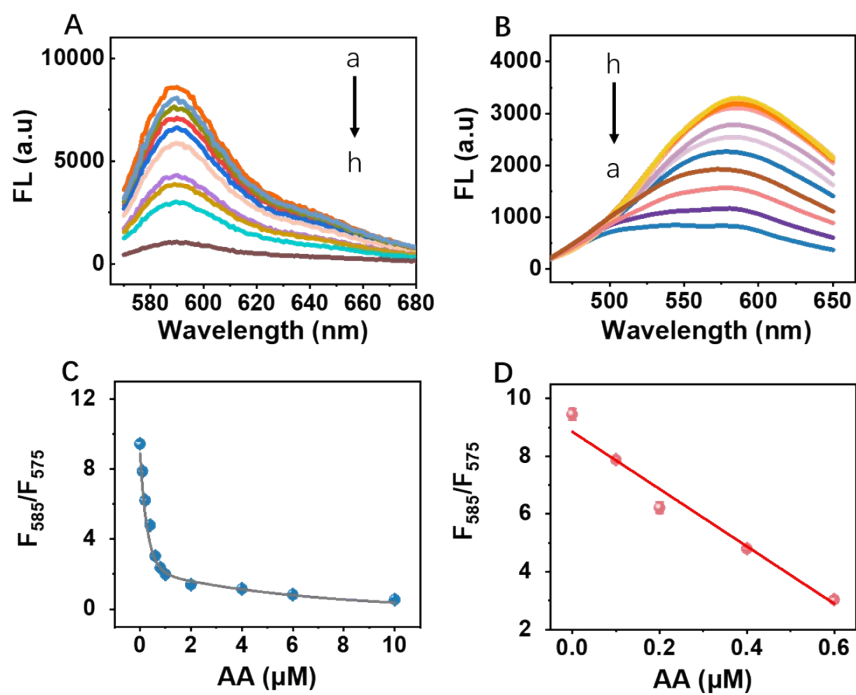

**Figure S15.** Ratiometric fluorescence detection of AA by using Fe NCs. (A, B) Fluorescence spectra of AR (A) and CUR (B) with different concentrations of AA (From a to h: 0, 0.1, 0.2, 0.4, 0.6, 0.8, 1, 2, 4, 6, and 10  $\mu\text{M}$ ). (C) Relationship between the fluorescence ratio ( $F_{585}/F_{575}$ ) and the concentrations of AA. (D) Linear calibration curve for AA detection.



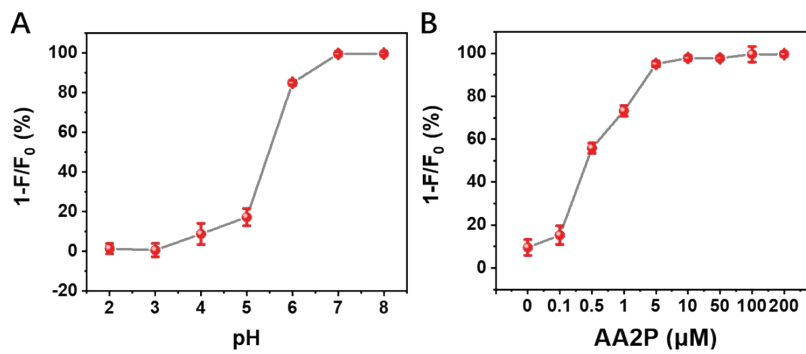

**Figure S16.** Optimization of experimental conditions for ALP detection. (A) Fluorescence response of AR catalyzed by Fef NCs under different pH. (B) Fluorescence response of AR catalyzed by Fef NCs with varying concentration of AA2P. [Fef NCs] = 100  $\mu\text{g/mL}$ , [ALP] = 40 mU/mL.

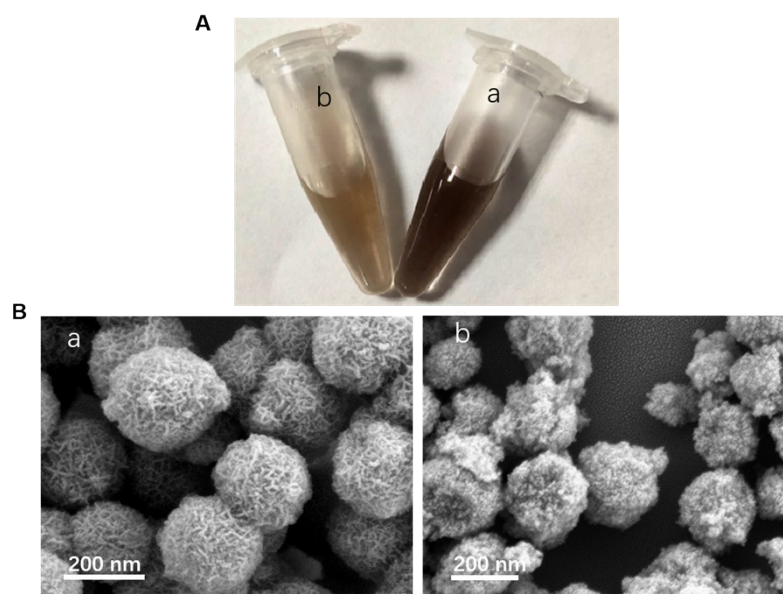

**Figure S17.** (A) Photograph of the reaction solutions and (B) SEM images of FeF NCs before (a) and after (b) the ratiometric fluorescence detection of ALP.

## References

- 1 B. Liu, Z. Huang and J. Liu, *Nanoscale*, 2016, **8**, 13562-13567.
- 2 J. Liu, L. Meng, Z. Fei, P. J. Dyson and L. Zhang, *Biosens. Bioelectron.*, 2018, **121**, 159-165.
- 3 L. Gao, J. Zhuang, L. Nie, J. Zhang, Y. Zhang, N. Gu, T. Wang, J. Feng, D. Yang, S. Perrett and X. Yan, *Nat. Nanotechnol.*, 2007, **2**, 577-583.
- 4 N. Lu, M. Zhang, L. Ding, J. Zheng, C. Zeng, Y. Wen, G. Liu, A. Aldalbahi, J. Shi, S. Song, X. Zuo and L. Wang, *Nanoscale*, 2017, **9**, 4508-4515.
- 5 N. Singh, M. A. Savanur, S. Srivastava, P. D'Silva and G. Mugesh, *Angew. Chem. Int. Ed. Engl.*, 2017, **56**, 14267-14271.
- 6 C. Ge, G. Fang, X. Shen, Y. Chong, W. G. Wamer, X. Gao, Z. Chai, C. Chen and J. J. Yin, *ACS Nano*, 2016, **10**, 10436-10445.
- 7 M. Li, J. Chen, W. Wu, Y. Fang and S. Dong, *J. Am. Chem. Soc.*, 2020, **142**, 15569-15574.
- 8 A. Rompel, H. Fischer, D. Meiwes, K. Büldt-Karentzopoulos, A. Magrini, C. Eicken, C. Gerdemann and B. Krebs, *FEBS Lett.*, 1999, **445**, 103-110.
- 9 D.-E. Wang, S. You, W. Huo, X. Han and H. Xu, *Microchimica Acta*, 2022, **189**, 70.
- 10 Y. Zhan, S. Yang, L. Chen, Y. Zeng, L. Li, L. Zhenyu, L. Guo and W. Xu, *ACS Sustainable Chemistry & Engineering*, 2021, **9**, 12922-12929.
- 11 X. Liu, X. Mei, J. Yang and Y. Li, *ACS Appl. Mater. Interfaces*, 2022, **14**, 6985-6993.
- 12 H. Huang, J. Bai, J. Li, L. Lei, W. Zhang, S. Yan and Y. Li, *J Mater Chem B*, 2019, **7**, 6508-6514.

- 13 L. Gao, Y. Li, Z.-Z. Huang and H. Tan, *Anal. Chim. Acta*, 2021, **1148**, 238193.
- 14 L. Zhang, Y. Li, G. Mu, L. Yang, C. Ren, Z. Wang, Q. Guo, J. Liu and C. Yang, *Anal. Chem.*, 2022, **94**, 2236-2243.
- 15 Y. Zhu, X. Tong, Q. Wei, G. Cai, Y. Cao, C. Tong, S. Shi and F. Wang, *Biosens. Bioelectron.*, 2022, **196**, 113691.
- 16 K. Phoonsawat, K. Khachornsakkul, N. Ratnarathorn, C. S. Henry and W. Dungchai, *ACS Sens*, 2021, **6**, 3047-3055.
- 17 R. Wang, Z. Wang, H. Rao, X. Xue, M. Luo, Z. Xue and X. Lu, *Chem. Commun. (Camb.)*, 2021, **57**, 4444-4447.
- 18 F. Ma, W.-j. Liu, L. Liang, B. Tang and C.-Y. Zhang, *Chem. Commun. (Camb.)*, 2018, **54**, 2413-2416.
- 19 L. Sappia, B. Felice, M. A. Sanchez, M. Martí, R. Madrid and M. I. Pividori, *Sens. Actuators B Chem.*, 2019, **281**, 221-228.
- 20 W. Wang, J. Lu, L. Hao, H. Yang, X. Song and F. Si, *Anal. Bioanal. Chem.*, 2021, **413**, 1827-1836.
